# Supplementary material
Source: publisher figshare collection journal article supplement (https://asha.figshare.com/articles/dataset/_/14787834)
Supplement: Supplementary file 1 [file 1]

## **Access to Internet and Technology Survey**

Based on the CDC, WHO, state, and university guidelines/restrictions related to the COVID-19 outbreak, all testing sessions must occur virtually until further notice. To help us with planning for this transition, please complete the following survey at your earliest convenience:

1. My child(ren)'s name(s):
2. My child(ren)'s current grade(s):
3. Do you have access to reliable internet?
  - a. Yes, our internet has been stable for at least the past couple months
  - b. Yes, most of the time
  - c. Yes, our internet has been stable for the past few weeks (but it has been spotty before COVID-19)
  - d. Sometimes
  - e. Our internet is not reliable/we don't have regular access to the internet
4. What kind of device would your child(ren) most likely use to complete the assessments?
  - a. iPad/tablet
  - b. Chromebook
  - c. Computer with a touchscreen
  - d. Computer with a mouse
  - e. Computer with a touchpad
  - f. We don't have access to a computer/tablet/internet
5. If you chose Chromebook as your device of choice, do you have another device option (other than a phone)?
  - a. Yes
  - b. Yes, but other family members regularly use that device
  - c. No
  - d. I did not choose Chromebook as my device of choice
6. What questions/comments/concerns do you have?
