# Supplementary material
Source: publisher figshare collection journal article supplement (https://asha.figshare.com/articles/dataset/_/14787834)
Supplement: Supplementary file 2 [file 1]

# VIRTUAL TESTING

## TIPS FOR VIRTUAL TEST ADMINISTRATION

### HOW TO INCREASE ENGAGEMENT:

1

Model a positive attitude and high energy throughout the session.

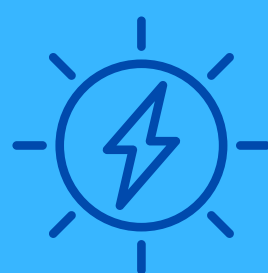

2

Encourage the child with motivational phrases and virtual high fives. Celebrate the end of a task!

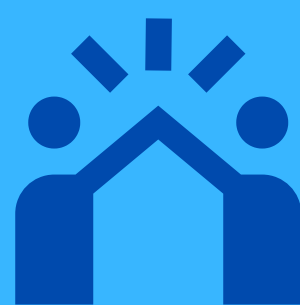

3

Invite parents to provide appropriate motivation and positive reinforcement to keep enthusiasm high on both ends of the screen!

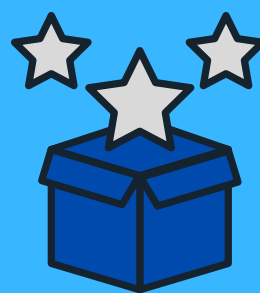

### HOW TO COMBAT FATIGUE:

1

Offer water, restroom, or movement (e.g., stretching, jumping jacks) breaks as necessary – especially in cases of decreased engagement

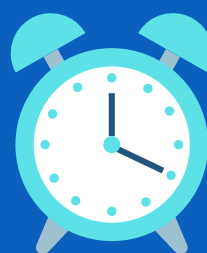

2

Count down the number of items left for the day (or before a break). If needed, offer the child a choice between: completing one more task or working longer next session

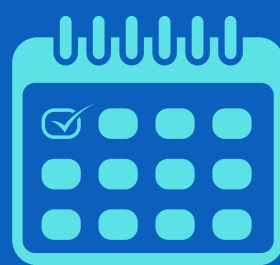

### WHAT TO DISCOURAGE:

1

Snack breaks! Chewing makes it hard for the evaluator to accurately identify the child's answer. Taking a full break for a snack may take a while!

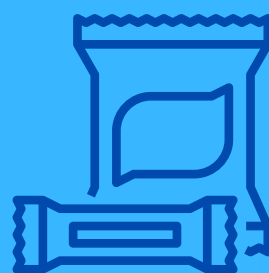

### WANT MORE INFORMATION?

Follow the Written Language Lab and Childhood Hearing Loss and Language Development Lab on social media for virtual testing tips and study updates!
