# Supplementary material
Source: publisher figshare collection journal article supplement (https://asha.figshare.com/articles/dataset/_/14787834)
Supplement: Supplementary file 3 [file 1]

# ELLA STUDY

## Checklist for Parents

1

### CHECK THAT YOU HAVE RECEIVED A ZOOM LINK.

You will receive a Zoom invitation email from the lab member working with you. Open this link in your browser to begin the session.

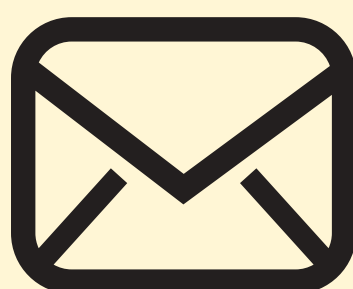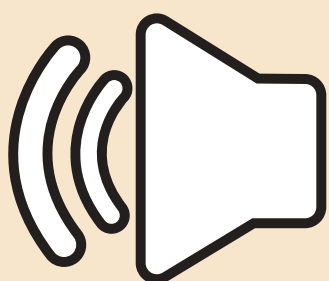

2

### DOWNLOAD THE DECIBELX APP FROM YOUR APP STORE.

No purchase necessary! Please do **not** sign up for the free trial. This app will be used to ensure your child has the same access to sound that he/she would if meeting in person.

3

### CHOOSE A QUIET, DISTRACTION-FREE LOCATION.

Remove distractions, pets - anything that might disrupt the session. Remember to have your child eat before the session starts.

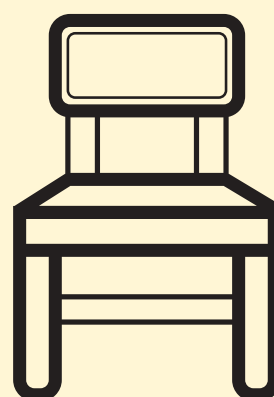

4

### SET UP YOUR COMPUTER.

Check that your computer has a camera and adjustable volume. Make sure your child is seated comfortably in front of the screen.

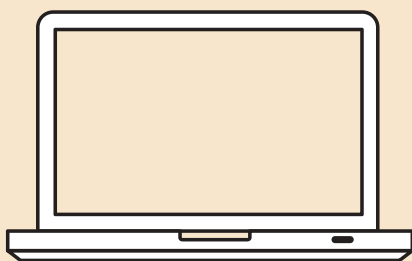

5

### BE READY TO PRACTICE!

At the start of the session, you and the lab member will check the room's sound levels, review expectations, and practice using relevant Zoom features. Please plan to participate for 10-15 minutes at the start of the session.

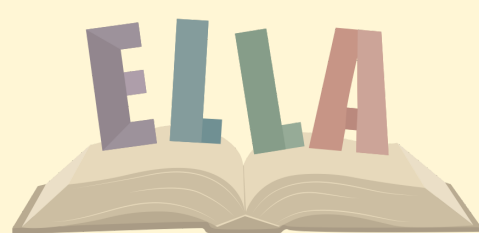

Early Language & Literacy Acquisition  
in Children with Hearing Loss Study
