# Supplementary material
Source: publisher figshare collection journal article supplement (https://asha.figshare.com/articles/dataset/_/14787834)

# VIRTUAL TESTING

## CONTROLLING SOUND LEVELS

### 1 USE A SOUND MEASUREMENT APP

Using a sound measurement app, such as DecibelX, will ensure that a child has similar access to sound compared to in-person evaluations.

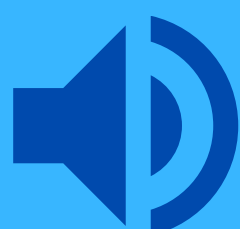

### 2 REDUCE BACKGROUND NOISE

Reducing background noise or moving to a more secluded area decreases distractions during testing and improves sound levels.

Potential Sources of Noise:

TV or music

Open windows

Yard work outside

Dishwasher

Other family members talking nearby

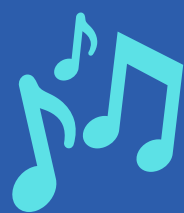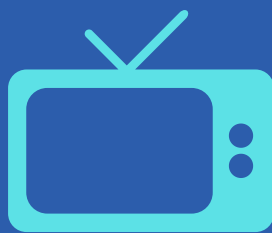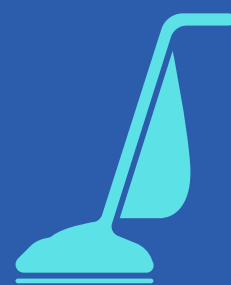

### 3 MEASURE SOUND LEVELS IN QUIET AND WHILE EVALUATOR IS SPEAKING

Instruct parents to take two readings: one of just the background noise and one while the evaluator reads a short paragraph at typical volume. Adjust volume level on child's computer as needed.

Optimal background noise level is  $< 40$  dB and speech noise level is approximately 60 dB.

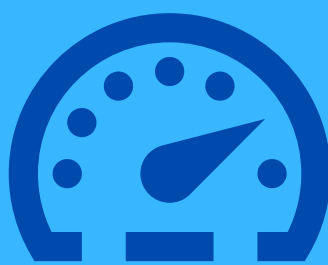

### WANT MORE INFORMATION?

Follow the Written Language Lab and the Childhood Hearing Loss and Language Development Lab on social media for virtual testing tips and study updates!

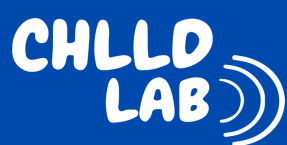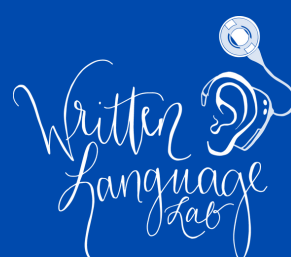

Supplement: Supplementary file 4 [file 1]
