# Supplementary material
Source: publisher figshare collection journal article supplement (https://asha.figshare.com/articles/dataset/_/14787834)

# VIRTUAL TESTING

## TIPS FOR PARENTS

1

### OUTLINE ROLES

Inform parents that their primary roles are: setting-up the device, accessing necessary features, and troubleshooting technological issues.

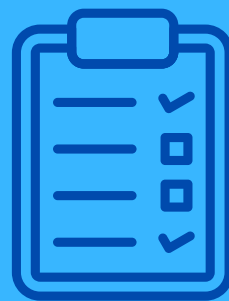

2

### ENCOURAGE NEUTRAL FEEDBACK

Remind parents to give neutral feedback and praise ("I like how hard you are working"), and to avoid repeating or rephrasing what the evaluator says, cueing the child when he/she responds incorrectly, and validating a child's correct answer.

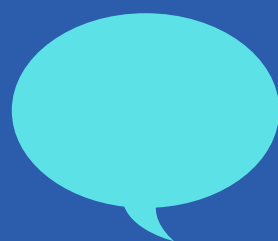

3

### SET TESTING EXPECTATIONS

Remind parents (and children) that the assessments administered during an evaluation differ from tests given in school. In school, children are typically expected to know all the answers on a test, whereas, in our testing sessions, children are not expected to get everything correct.

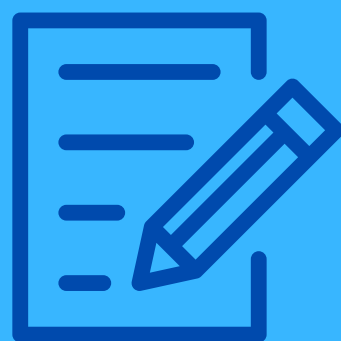

4

### DESCRIBE TASKS

Provide a short description of each assessment before beginning the task. Parents may be unfamiliar with the purpose of tasks and describing expectations of the child can help parents give neutral feedback.

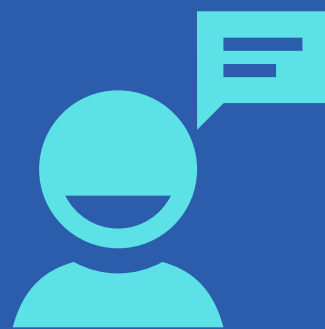

### WANT MORE INFORMATION?

Follow the Written Language Lab and Childhood Hearing Loss and Language Development Lab on social media for virtual testing tips and study updates!

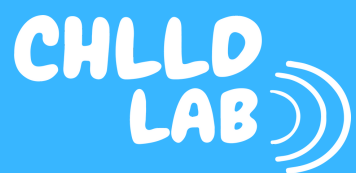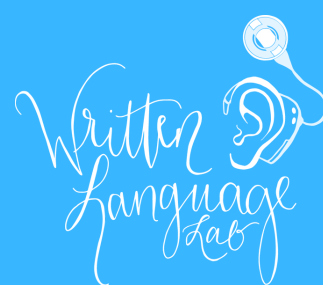

Supplement: Supplementary file 6 [file 1]
