# Supplementary material
Source: publisher figshare collection journal article supplement (https://asha.figshare.com/articles/dataset/_/14787834)
Supplement: Supplementary file 7 [file 1]

# ELLA STUDY

## Engagement Reminders

Working over the computer can be hard. Here's how you can help!

1

### PRAISE YOUR CHILD FOR TRYING HIS OR HER BEST.

We do not expect your child to get every question right. Instead of praising correct answers or correcting wrong answers, compliment your child on his or her attention or effort.

2

### REDIRECT.

It's okay if your child gets distracted occasionally - or excited to tell the lab member a story! When this happens, you may need to ignore the unwanted behavior and encourage engagement in the activity at hand.

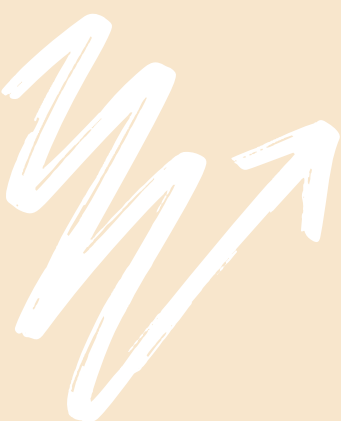

3

### TELL, DON'T ASK.

Do you want your child to make a choice from the screen? Instead of saying "Do you want to put a star on the picture?" tell your child "Put your finger on the picture you choose."

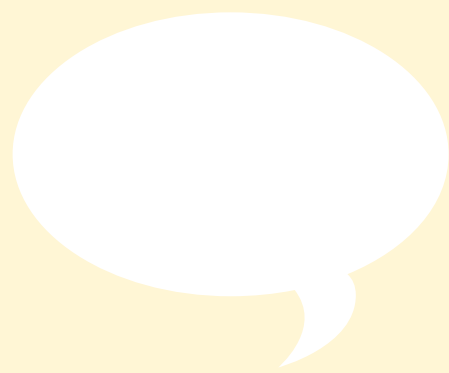

4

### REMIND YOUR CHILD TO LISTEN TO THE LAB MEMBER WHEN USING THE "ANNOTATE" FEATURES.

We want to make sure we record your child's answers correctly!

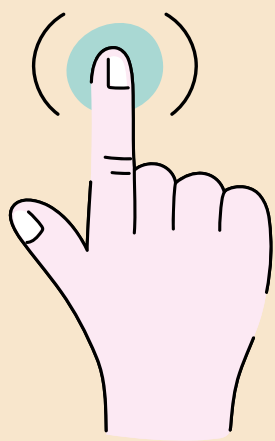

5

### BE READY TO BE FLEXIBLE!

Our lab members are excited to meet with you and your child! We will work with you to maximize your child's engagement. This may involve changes and flexibility!

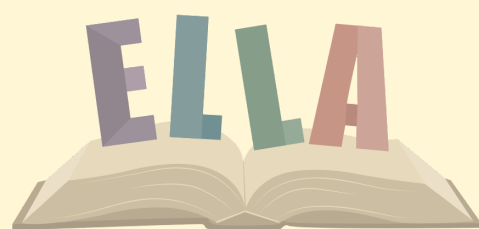

Early Language & Literacy Acquisition  
in Children with Hearing Loss Study
